# Supplementary material for: Transcriptomic analysis of sorted lung cells revealed a proviral activity of the NF-κB pathway towards SARS-CoV-2
Source: bioRxiv or medRxiv preprint supplement (doi:10.1101/2022.02.25.481978), 2023-05-30
Supplement: Supplementary file [file media-1.pdf]

**Table S6:** RT-qPCR primer sequences.

| Target       | Forward primer (5'->3')   | Reverse Primer (5'->3')  |
|--------------|---------------------------|--------------------------|
| BPTF         | GGAGAGATGTTGGTCCTTATGG    | CTTTCCTCTGAGGTGTAGGCGT   |
| SARS-CoV-2 N | GGTAACTGGTATGATTTTCG      | CTGGTCAAGGTTAATATAGG     |
| IL32         | TCAAAGAGGGCTACCTGGAGAC    | TCTGTTGCCTCGGCACCGTAAT   |
| FEN1         | AAGGTCACTAAGCAGCACAATG    | GTAGCCGCAGCATAGACTTTG    |
| ITGAM        | GGAACGCCATTGTCTGCTTTTCG   | ATGCTGAGGTCATCCTGGCAGA   |
| TRAF1        | TTCACCTCCAATGACGAGCC      | AAGCTCTCGGGCTAGGAAGA     |
| SNRPF        | TGTCTGGACATCTGGGTGAA      | TCCCCACAAAAGATGCTAT      |
| IL6          | TTCTCCACAAGCGCCTTC        | GGGCGGCTACATCTTTGGAA     |
| CXCL1        | CTGGCTTAGAACAAAGGGGCT     | TAAAGGTAGCCCTTGTTTTCCCC  |
| CCL2         | CCCAAAGAAGCTGTGATCTTCA    | TCTGGGGAAAGCTAGGGGAA     |
| CXCL8        | GCGCCAACACAGAAATTATTGTAAA | TGCTTGAAGTTTCACTGGCATC   |
| CCL20        | AAGTTGTCTGTGTGCGCAAATCC   | CCATTCCAGAAAAGCCACAGTTTT |
| IFNB         | AAGCAATTGTCCAGTCCCA       | TGCATTACCTGAAGGCCAAG     |
| IFNL1        | TCAGCTTGAGTGACTCTTCCAAGG  | GCCACATTGGCAGGTTCAAATCTC |
| IFNL2/3      | TCCAGAACCTTCAGCGTCAG      | AGGGCCAAAGATGCCTTAGA     |
| NFKB1        | GCTTAGGAGGGAGAGCCCA       | GGTATGGGCCATCTGCTGTT     |
| WAKMAR2      | GCACGTGATGAGCGCGTAG       | ATGAGCCAGATAGGGGCAGT     |
| AC016747.1   | TGCCAGTACAACAGCCACAA      | CAACCAAATCGGGAAAGCCG     |
| Contig707    | GGCTGAATGCACATCACCTTA     | TGCTTCATGTCTTCCTTCACG    |
| Contig4963   | TGAGGGGCTTGTATAGTGGGA     | ATTTCCTTCTCCGCAGGC       |
| AL132990.1   | GGGGCTACGGGTTGTCTTTT      | AATGATGGGCCACTGAGTCC     |
| DANCR        | AGCTCCAGGAGTTCGTCTCT      | TGGCTTGTGCCTGTAGTTGT     |
| TP53TG1      | GCGAACACTTACACCAGTGC      | AGGGTTACTCAGACCTGCCA     |
| ADIRF-AS1    | AGGAGGGAGGAGGCAGTAAG      | GACCCTTGCCCCCTTTTACA     |
